# Supplementary material for: Application of a Multilayer Perceptron Artificial Neural Network for the Prediction and Optimization of the Andrographolide Content in Andrographis paniculata
Source: MDPI journal article supplement (doi:10.3390/molecules27092765), 2022-04-26
Supplement: s1 [file s1]

## Supplementary materials

**Table S1.** Actual and predicted Andrographolide content of training dataset.

| Acc. No. | Target | Output | Absolute Error | Square of Absolute Error | Absolute Percentage Error |
|----------|--------|--------|----------------|--------------------------|---------------------------|
| AP-1     | 1.335  | 1.392  | 0.058          | 0.003                    | 4.331                     |
| AP-10    | 1.303  | 1.351  | 0.048          | 0.002                    | 3.705                     |
| AP-11    | 1.860  | 1.925  | 0.065          | 0.004                    | 3.517                     |
| AP-13    | 1.926  | 1.845  | 0.082          | 0.007                    | 4.239                     |
| AP-14    | 2.865  | 2.758  | 0.107          | 0.011                    | 3.736                     |
| AP-20    | 1.466  | 1.515  | 0.049          | 0.002                    | 3.354                     |
| AP-23    | 0.975  | 0.896  | 0.078          | 0.006                    | 8.050                     |
| AP-24    | 2.812  | 3.026  | 0.214          | 0.046                    | 7.624                     |
| AP-26    | 4.412  | 4.264  | 0.148          | 0.022                    | 3.364                     |
| AP-34    | 2.719  | 3.065  | 0.347          | 0.120                    | 12.749                    |
| AP-35    | 0.646  | 0.715  | 0.069          | 0.005                    | 10.738                    |
| AP-37    | 1.906  | 1.892  | 0.014          | 0.000                    | 0.726                     |
| AP-38    | 3.555  | 3.915  | 0.360          | 0.129                    | 10.118                    |
| AP-39    | 3.545  | 3.814  | 0.270          | 0.073                    | 7.607                     |
| AP-21    | 0.778  | 0.825  | 0.047          | 0.002                    | 6.054                     |
| AP-44    | 1.467  | 1.622  | 0.155          | 0.024                    | 10.543                    |
| AP-46    | 2.617  | 2.755  | 0.139          | 0.019                    | 5.298                     |
| AP-12    | 2.569  | 2.921  | 0.352          | 0.124                    | 13.712                    |
| AP-55    | 1.236  | 1.400  | 0.164          | 0.027                    | 13.272                    |
| AP-56    | 2.464  | 2.571  | 0.106          | 0.011                    | 4.321                     |
| AP-60    | 2.758  | 2.569  | 0.189          | 0.036                    | 6.860                     |
| AP-2     | 2.455  | 2.817  | 0.362          | 0.131                    | 14.749                    |
| AP-3     | 1.028  | 1.162  | 0.134          | 0.018                    | 13.015                    |
| AP-4     | 1.694  | 1.680  | 0.014          | 0.000                    | 0.844                     |
| AP-56    | 1.952  | 1.846  | 0.106          | 0.011                    | 5.438                     |
| AP-73    | 2.928  | 2.937  | 0.009          | 0.000                    | 0.292                     |
| AP-74    | 1.011  | 1.052  | 0.041          | 0.002                    | 4.038                     |
| AP-61    | 1.543  | 1.850  | 0.307          | 0.094                    | 19.876                    |
| AP-62    | 1.386  | 1.366  | 0.020          | 0.000                    | 1.464                     |
| AP-63    | 1.778  | 1.547  | 0.231          | 0.053                    | 12.986                    |
| AP-64    | 2.501  | 2.301  | 0.200          | 0.040                    | 7.994                     |
| AP-65    | 1.281  | 1.308  | 0.027          | 0.001                    | 2.135                     |
| AP-66    | 0.862  | 0.712  | 0.150          | 0.023                    | 17.436                    |
| AP-72    | 2.945  | 2.968  | 0.023          | 0.001                    | 0.778                     |
| AP-76    | 1.049  | 1.127  | 0.078          | 0.006                    | 7.443                     |
| AP-77    | 1.645  | 1.770  | 0.125          | 0.016                    | 7.630                     |

|        |       |       |       |       |        |
|--------|-------|-------|-------|-------|--------|
| AP-78  | 1.632 | 1.456 | 0.176 | 0.031 | 10.796 |
| AP-79  | 1.218 | 1.372 | 0.154 | 0.024 | 12.674 |
| AP-48  | 1.962 | 1.931 | 0.032 | 0.001 | 1.621  |
| AP-18  | 1.502 | 1.353 | 0.149 | 0.022 | 9.911  |
| AP-19  | 1.739 | 1.557 | 0.182 | 0.033 | 10.457 |
| AP-82  | 0.849 | 0.832 | 0.018 | 0.000 | 2.084  |
| AP-40  | 0.730 | 0.812 | 0.082 | 0.007 | 11.239 |
| AP-83  | 0.756 | 0.833 | 0.077 | 0.006 | 10.230 |
| AP-86  | 2.251 | 2.358 | 0.106 | 0.011 | 4.718  |
| AP-87  | 1.173 | 1.076 | 0.097 | 0.009 | 8.256  |
| AP-89  | 1.682 | 1.554 | 0.128 | 0.016 | 7.607  |
| AP-91  | 1.145 | 1.297 | 0.152 | 0.023 | 13.308 |
| AP-27  | 1.304 | 1.224 | 0.081 | 0.006 | 6.177  |
| AP-28  | 0.769 | 0.804 | 0.034 | 0.001 | 4.453  |
| AP-29  | 3.759 | 3.349 | 0.409 | 0.168 | 10.893 |
| AP-30  | 5.230 | 5.157 | 0.073 | 0.005 | 1.389  |
| AP-31  | 5.394 | 4.884 | 0.510 | 0.260 | 9.456  |
| AP-33  | 3.743 | 3.391 | 0.352 | 0.124 | 9.394  |
| AP-6   | 3.099 | 3.272 | 0.173 | 0.030 | 5.572  |
| AP-8   | 2.832 | 2.466 | 0.366 | 0.134 | 12.922 |
| AP-51  | 2.678 | 2.328 | 0.350 | 0.122 | 13.065 |
| AP-52  | 3.760 | 3.460 | 0.300 | 0.090 | 7.983  |
| AP-53  | 3.680 | 3.176 | 0.504 | 0.254 | 13.702 |
| AP-67  | 3.523 | 3.461 | 0.062 | 0.004 | 1.763  |
| AP-68  | 3.544 | 3.210 | 0.334 | 0.112 | 9.437  |
| AP-69  | 3.515 | 3.346 | 0.169 | 0.029 | 4.819  |
| AP-42  | 3.918 | 3.781 | 0.136 | 0.019 | 3.480  |
| AP-43  | 2.943 | 2.568 | 0.375 | 0.141 | 12.748 |
| AP-85  | 2.030 | 2.292 | 0.262 | 0.069 | 12.902 |
| AP-92  | 1.667 | 1.721 | 0.054 | 0.003 | 3.249  |
| AP-123 | 2.248 | 2.523 | 0.275 | 0.076 | 12.242 |
| AP-93  | 1.770 | 1.634 | 0.136 | 0.019 | 7.696  |
| AP-127 | 0.772 | 0.823 | 0.050 | 0.003 | 6.523  |
| AP-130 | 0.280 | 0.302 | 0.022 | 0.000 | 7.929  |
| AP-131 | 0.648 | 0.587 | 0.062 | 0.004 | 9.534  |
| AP-135 | 0.802 | 0.724 | 0.078 | 0.006 | 9.758  |
| AP-136 | 0.988 | 0.879 | 0.108 | 0.012 | 10.977 |
| AP-137 | 0.319 | 0.340 | 0.021 | 0.000 | 6.500  |
| AP-94  | 1.350 | 1.370 | 0.020 | 0.000 | 1.496  |
| AP-143 | 0.358 | 0.382 | 0.024 | 0.001 | 6.752  |

|        |       |       |       |        |        |
|--------|-------|-------|-------|--------|--------|
| AP-116 | 0.411 | 0.458 | 0.047 | 0.002  | 11.317 |
| AP-140 | 0.463 | 0.506 | 0.043 | 0.002  | 9.204  |
| AP-124 | 1.231 | 1.099 | 0.132 | 0.017  | 10.688 |
| AP-132 | 0.802 | 0.837 | 0.035 | 0.001  | 4.340  |
| AP-144 | 0.910 | 0.812 | 0.097 | 0.009  | 10.706 |
| AP-96  | 1.486 | 1.499 | 0.014 | 0.000  | 0.925  |
| AP-117 | 0.774 | 0.689 | 0.084 | 0.007  | 10.900 |
| AP-145 | 2.028 | 1.968 | 0.060 | 0.004  | 2.950  |
| AP-147 | 1.352 | 1.185 | 0.167 | 0.028  | 12.325 |
| AP-149 | 0.338 | 0.357 | 0.019 | 0.000  | 5.509  |
| AP-118 | 0.669 | 0.616 | 0.053 | 0.003  | 7.966  |
| AP-98  | 0.355 | 0.371 | 0.016 | 0.000  | 4.479  |
| AP-146 | 2.483 | 2.296 | 0.187 | 0.035  | 7.538  |
| AP-99  | 2.693 | 2.503 | 0.190 | 0.036  | 7.073  |
| AP-100 | 0.284 | 0.314 | 0.030 | 0.001  | 10.621 |
| AP-150 | 1.992 | 2.045 | 0.053 | 0.003  | 2.682  |
| AP-102 | 1.990 | 2.056 | 0.067 | 0.004  | 3.348  |
| AP-104 | 1.499 | 1.351 | 0.148 | 0.022  | 9.859  |
| AP-105 | 1.555 | 1.429 | 0.126 | 0.016  | 8.122  |
| AP-106 | 1.882 | 1.694 | 0.188 | 0.035  | 9.995  |
| AP-119 | 1.906 | 1.695 | 0.211 | 0.045  | 11.070 |
| AP-142 | 2.013 | 1.898 | 0.115 | 0.013  | 5.696  |
| AP-109 | 1.998 | 1.896 | 0.102 | 0.010  | 5.098  |
| AP-121 | 1.923 | 1.789 | 0.134 | 0.018  | 6.971  |
| AP-110 | 1.580 | 1.449 | 0.131 | 0.017  | 8.307  |
| AP-111 | 1.661 | 1.559 | 0.102 | 0.010  | 6.159  |
| AP-148 | 2.603 | 2.891 | 0.288 | 0.083  | 11.067 |
| AP-122 | 1.952 | 2.082 | 0.130 | 0.017  | 6.664  |
| AP-138 | 0.475 | 0.510 | 0.035 | 0.001  | 7.344  |
| AP-133 | 3.582 | 3.437 | 0.146 | 0.021  | 4.062  |
| Mean   |       |       |       | 0.0322 | 7.6295 |
| RMSE   |       |       |       | 0.1793 |        |

**Table S2.** Actual and predicted Andrographolide content of testing dataset.

| Acc. No. | Target | Output | Absolute Error | Square of Absolute Error | Absolute Percentage Error |
|----------|--------|--------|----------------|--------------------------|---------------------------|
| AP-15    | 1.094  | 1.149  | 0.055          | 0.003                    | 5.032                     |
| AP-25    | 2.585  | 2.981  | 0.396          | 0.157                    | 15.306                    |
| AP-45    | 3.643  | 3.964  | 0.321          | 0.103                    | 8.819                     |
| AP-59    | 2.805  | 2.521  | 0.284          | 0.081                    | 10.138                    |

|         |       |       |       |       |        |
|---------|-------|-------|-------|-------|--------|
| AP-71   | 4.664 | 4.622 | 0.042 | 0.002 | 0.903  |
| AP-75   | 3.047 | 2.671 | 0.376 | 0.141 | 12.344 |
| AP-17   | 4.707 | 4.293 | 0.414 | 0.171 | 8.797  |
| AP-80   | 0.854 | 0.874 | 0.020 | 0.000 | 2.303  |
| AP-41   | 4.222 | 4.170 | 0.052 | 0.003 | 1.234  |
| AP-88   | 1.733 | 1.533 | 0.200 | 0.040 | 11.553 |
| AP-7    | 4.927 | 4.349 | 0.577 | 0.333 | 11.718 |
| AP-54   | 3.022 | 3.359 | 0.337 | 0.113 | 11.145 |
| AP-84   | 2.964 | 2.922 | 0.042 | 0.002 | 1.420  |
| AP-113  | 1.024 | 1.059 | 0.035 | 0.001 | 3.427  |
| AP-115  | 0.600 | 0.562 | 0.038 | 0.001 | 6.335  |
| AP-95   | 1.453 | 1.226 | 0.227 | 0.051 | 15.606 |
| AP-125  | 0.799 | 0.748 | 0.052 | 0.003 | 6.470  |
| AP-141  | 1.909 | 1.722 | 0.187 | 0.035 | 9.774  |
| AP-129  | 2.250 | 2.506 | 0.257 | 0.066 | 11.406 |
| AP-126  | 2.627 | 2.472 | 0.155 | 0.024 | 5.894  |
| AP-112  | 1.932 | 2.192 | 0.260 | 0.068 | 13.458 |
| AP-134  | 1.960 | 2.023 | 0.063 | 0.004 | 3.235  |
| Average |       |       |       | 0.064 | 7.907  |
| RMSE    |       |       |       | 0.253 |        |

**Table S3.** Actual and predicted Andrographolide content of validation dataset.

| Acc. No. | Target | Output | Absolute Error | Square of Absolute Error | Absolute Percentage Error |
|----------|--------|--------|----------------|--------------------------|---------------------------|
| AP-94    | 0.676  | 0.662  | 0.014          | 0.000                    | 2.063                     |
| AP-22    | 1.822  | 1.603  | 0.219          | 0.048                    | 12.009                    |
| AP-47    | 1.661  | 1.815  | 0.154          | 0.024                    | 9.285                     |
| AP-57    | 2.460  | 2.743  | 0.284          | 0.080                    | 11.527                    |
| AP-58    | 2.824  | 2.573  | 0.251          | 0.063                    | 8.877                     |
| AP-16    | 2.990  | 2.731  | 0.260          | 0.067                    | 8.679                     |
| AP-49    | 1.042  | 1.191  | 0.149          | 0.022                    | 14.345                    |
| AP-90    | 1.386  | 1.552  | 0.166          | 0.028                    | 12.009                    |
| AP-32    | 3.972  | 3.510  | 0.462          | 0.213                    | 11.624                    |
| AP-5     | 4.288  | 4.141  | 0.148          | 0.022                    | 3.442                     |
| AP-9     | 5.446  | 4.891  | 0.555          | 0.308                    | 10.195                    |
| AP-81    | 4.368  | 4.034  | 0.334          | 0.111                    | 7.640                     |
| AP-50    | 2.744  | 2.589  | 0.156          | 0.024                    | 5.667                     |
| AP-128   | 0.650  | 0.642  | 0.008          | 0.000                    | 1.254                     |
| AP-114   | 0.573  | 0.613  | 0.040          | 0.002                    | 7.039                     |
| AP-139   | 0.338  | 0.351  | 0.013          | 0.000                    | 3.947                     |

|        |       |       |       |       |        |
|--------|-------|-------|-------|-------|--------|
| AP-97  | 0.383 | 0.351 | 0.033 | 0.001 | 8.527  |
| AP-101 | 0.350 | 0.364 | 0.014 | 0.000 | 4.035  |
| AP-103 | 1.444 | 1.285 | 0.159 | 0.025 | 11.010 |
| AP-107 | 1.536 | 1.524 | 0.012 | 0.000 | 0.761  |
| AP-108 | 0.661 | 0.558 | 0.103 | 0.011 | 15.633 |
| AP-120 | 1.857 | 1.804 | 0.053 | 0.003 | 2.832  |
| Mean   |       |       |       | 0.048 | 7.836  |
| RMSE   |       |       |       | 0.219 |        |

**Table S4.** Geographic locations and habitats characteristics of *Andrographis paniculata* populations.

| Serial No. | Acc. No | Place                | State & District | Latitude and Longitude             | Year of sample collection | Voucher No. |
|------------|---------|----------------------|------------------|------------------------------------|---------------------------|-------------|
| 1          | AP-1    | Ekamra garden        | Odisha, Khordha  | 20° 16' 19.20" N, 85° 49' 58.80" E | 2019                      | 1098/CBT    |
| 2          | AP-2    | Barunei road         | Odisha, Khordha  | 20° 10' 15.60" N, 85° 38' 60.00" E | 2019                      | 1100/CBT    |
| 3          | AP-3    | Barunei pitha        | Odisha, Khordha  | 20° 09' 39.60" N, 85° 38' 52.80" E | 2019                      | 1101/CBT    |
| 4          | AP-4    | Baibhava vihar       | Odisha, Khordha  | 20° 10' 55.20" N, 85° 39' 18.00" E | 2019                      | 1102/CBT    |
| 5          | AP-5    | Mukudaprasad         | Odisha, Khordha  | 20° 10' 12.00" N, 85° 38' 20.40" E | 2019                      | 1103/CBT    |
| 6          | AP-6    | Barunei pitha        | Odisha, Khordha  | 20° 09' 39.60" N, 85° 38' 52.80" E | 2019                      | 1104/CBT    |
| 7          | AP-7    | Barunei pitha        | Odisha, Khordha  | 20° 09' 32.40" N, 85° 38' 42.00" E | 2019                      | 1105/CBT    |
| 8          | AP-8    | Gada Khordha         | Odisha, Khordha  | 20° 09' 46.80" N, 85° 37' 48.00" E | 2019                      | 1106/CBT    |
| 9          | AP-9    | Gada Khordha         | Odisha, Khordha  | 20° 09' 36.00" N, 85° 37' 44.40" E | 2019                      | 1108/CBT    |
| 10         | AP-10   | Baliapala            | Odisha, Balasore | 21° 39' 14.40" N, 87° 16' 58.80" E | 2019                      | 1126/CBT    |
| 11         | AP-11   | Nilagiri             | Odisha, Balasore | 21° 27' 39.60" N, 86° 45' 21.60" E | 2019                      | 1127/CBT    |
| 12         | AP-12   | Jamalpur             | Odisha, Balasore | 21° 29' 33.50" N, 86° 56' 00.50" E | 2019                      | 1128/CBT    |
| 13         | AP-13   | Ambapua              | Odisha, Ganjam   | 19° 19' 01.90" N, 84° 50' 50.30" E | 2019                      | 1129/CBT    |
| 14         | AP-14   | Kholikot college     | Odisha, Ganjam   | 19° 18' 28.00" N, 84° 47' 39.40" E | 2019                      | 1130/CBT    |
| 15         | AP-15   | Berhampur University | Odisha, Ganjam   | 19° 17' 42.00" N, 84° 52' 48.00" E | 2019                      | 1131/CBT    |
| 16         | AP-16   | Nirmalajhara         | Odisha, Ganjam   | 19° 35' 45.60" N, 85° 03' 39.60" E | 2019                      | 1133/CBT    |
| 17         | AP-17   | Bharasa              | Odisha, Ganjam   | 19° 36' 25.200" N, 85° 3' 21.60" E | 2019                      | 1134/CBT    |
| 18         | AP-18   | Tamana               | Odisha, Ganjam   | 19° 13' 58.80" N, 84° 40' 58.80" E | 2019                      | 1135/CBT    |
| 19         | AP-19   | Taptapani            | Odisha, Ganjam   | 19° 28' 51.60" N, 84° 25' 26.40" E | 2019                      | 1136/CBT    |
| 20         | AP-20   | Naraja               | Odisha, cuttack  | 20° 28' 12.00" N, 85° 46' 40.80" E | 2019                      | 1113/CBT    |
| 21         | AP-21   | Radhakishorepur      | Odisha, Cuttack  | 20° 33' 25.20" N, 85° 45' 25.20" E | 2019                      | 1114/CBT    |
| 22         | AP-22   | Chodwar              | Odisha, Cuttack  | 20° 31' 26.40" N, 85° 54' 10.80" E | 2019                      | 1115/CBT    |
| 23         | AP-23   | Paralakhemundi       | Odisha, Gajapati | 18° 46' 40.80" N, 84° 06' 32.40" E | 2019                      | 1137/CBT    |
| 24         | AP-24   | Madaba               | Odisha, Gajapati | 18° 57' 58.10" N, 84° 20' 57.80" E | 2019                      | 1138/CBT    |
| 25         | AP-25   | Budisila             | Odisha, Gajapati | 19° 07' 55.20" N, 84° 07' 51.60" E | 2019                      | 1139/CBT    |
| 26         | AP-26   | Rayagada             | Odisha, Gajapati | 18° 59' 16.80" N, 84° 08' 02.40" E | 2019                      | 1140/CBT    |
| 27         | AP-27   | Barghala             | Odisha, Gajapati | 18° 52' 40.80" N, 84° 11' 45.60" E | 2019                      | 1141/CBT    |
| 28         | AP-28   | Hatapada             | Odisha, Gajapati | 18° 57' 46.80" N, 84° 09' 50.40" E | 2019                      | 1142/CBT    |

|    |       |                 |                    |                                     |      |          |
|----|-------|-----------------|--------------------|-------------------------------------|------|----------|
| 29 | AP-29 | Mahendragiri    | Odisha, Gajapati   | 18° 59' 49.20" N, 84° 07' 40.80" E  | 2019 | 1143/CBT |
| 30 | AP-30 | Budisila        | Odisha, Gajapati   | 19° 07' 51.60" N, 84° 07' 55.20" E  | 2019 | 1144/CBT |
| 31 | AP-31 | Budisila        | Odisha, Gajapati   | 19° 07' 48.00" N, 84° 07' 55.20" E  | 2019 | 1145/CBT |
| 32 | AP-32 | Karadasigh      | Odisha, Gajapati   | 18° 55' 26.40" N, 84° 12' 25.20" E  | 2019 | 1146/CBT |
| 33 | AP-33 | Alluri Nagar    | Odisha, Gajapati   | 18° 48' 46.80" N, 84° 08' 38.40" E  | 2019 | 1147/CBT |
| 34 | AP-34 | Nimapada        | Odisha, Puri       | 20° 03' 21.60" N, 86° 0.0' 14.40" E | 2019 | 1109/CBT |
| 35 | AP-35 | Balisahi        | Odisha, Puri       | 19° 57' 57.60" N, 86° 01' 33.60" E  | 2019 | 1110/CBT |
| 36 | AP-36 | Khalakata patna | Odisha, Puri       | 19° 53' 14.60" N, 86° 05' 40.50" E  | 2019 | 1111/CBT |
| 37 | AP-37 | Banpur          | Odisha, Puri       | 20° 05' 52.80" N, 85° 53' 38.40" E  | 2019 | 1112/CBT |
| 38 | AP-38 | Jharabandha     | Odisha, Dhenkanala | 20° 32' 24.00" N, 85° 34' 51.60" E  | 2019 | 1117/CBT |
| 39 | AP-39 | Deagaon         | Odisha, Dhenkanala | 20° 41' 49.90" N, 85° 44' 50.60" E  | 2019 | 1119/CBT |
| 40 | AP-40 | Gandanali       | Odisha, Dhenkanala | 20° 35' 52.80" N, 85° 21' 03.60" E  | 2019 | 1120/CBT |
| 41 | AP-41 | Baunsapokhari   | Odisha, Dhenkanala | 20° 39' 50.40" N, 85° 10' 44.40" E  | 2019 | 1121/CBT |
| 42 | AP-42 | Mahulakhali     | Odisha, Dhankanal  | 20° 41' 13.20" N, 85° 44' 24.00" E  | 2019 | 1122/CBT |
| 43 | AP-43 | Kapilash        | Odisha, Dhankanal  | 20° 41' 13.20" N, 85° 45' 25.20" E  | 2019 | 1123/CBT |
| 44 | AP-44 | Chitrada        | Odisha, Mayurbhanj | 21° 50' 58.50" N, 86° 56' 41.60" E  | 2019 | 1155/CBT |
| 45 | AP-45 | Betnoti         | Odisha, Mayurbhanj | 21° 44' 27.60" N, 86° 50' 42.00" E  | 2019 | 1156/CBT |
| 46 | AP-46 | Baisingha       | Odisha, Mayurbhanj | 21° 38' 47.40" N, 86° 54' 53.28" E  | 2019 | 1157/CBT |
| 47 | AP-47 | Betnosia        | Odisha, Mayurbhanj | 21° 44' 23.60" N, 86° 50' 35.50" E  | 2019 | 1158/CBT |
| 48 | AP-48 | Shankarpur      | Odisha, Mayurbhanj | 22° 00' 57.60" N, 85° 42' 32.40" E  | 2019 | 1159/CBT |
| 49 | AP-49 | Phulkong forest | Odisha, Mayurbhanj | 22° 01' 12.00" N, 85° 45' 39.60" E  | 2019 | 1160/CBT |
| 50 | AP-50 | Similipala road | Odisha, Mayurbhanj | 21° 53' 16.80" N, 86° 11' 38.40" E  | 2019 | 1149/CBT |
| 51 | AP-51 | Jashipur        | Odisha, Mayurbhanj | 21° 53' 27.60" N, 86° 11' 49.20" E  | 2019 | 1150/CBT |
| 52 | AP-52 | Similipala road | Odisha, Mayurbhanj | 21° 54' 07.20" N, 86° 11' 24.00" E  | 2019 | 1151/CBT |
| 53 | AP-53 | Baman Ghati     | Odisha, Mayurbhanj | 22° 10' 08.40" N, 86° 29' 38.40" E  | 2019 | 1153/CBT |
| 54 | AP-54 | Baman Ghati     | Odisha, Mayurbhanj | 22° 09' 54.00" N, 86° 31' 15.60" E  | 2019 | 1154/CBT |
| 55 | AP-55 | Khandapada      | Odisha, Nayagargh  | 20° 12' 36.00" N, 85° 08' 24.00" E  | 2019 | 1164/CBT |
| 56 | AP-56 | Sampada         | Odisha, Nayagargh  | 20° 12' 36.00" N, 84° 58' 26.40" E  | 2019 | 1165/CBT |
| 57 | AP-57 | Gania           | Odisha, Nayagargh  | 20° 12' 36.00" N, 84° 58' 26.40" E  | 2019 | 1166/CBT |
| 58 | AP-58 | Pratap prasad   | Odisha, Nayagargh  | 20° 07' 51.60" N, 85° 08' 31.20" E  | 2019 | 1167/CBT |
| 59 | AP-59 | Palli sasan     | Odisha, Nayagargh  | 20° 04' 58.80" N, 85° 06' 18.00" E  | 2019 | 1168/CBT |
| 60 | AP-60 | Ratanpur        | Odisha, Nayagargh  | 20° 07' 55.20" N, 85° 06' 36.00" E  | 2019 | 1169/CBT |
| 61 | AP-61 | Kakalama        | Odisha, Nayagargh  | 20° 04' 30.00" N, 85° 15' 18.00" E  | 2019 | 1170/CBT |
| 62 | AP-62 | Itamati         | Odisha, Nayagargh  | 20° 0.0' 10.80" N, 85° 22' 19.20" E | 2019 | 1171/CBT |
| 63 | AP-63 | Odagaon         | Odisha, Nayagargh  | 20° .00' 14.40" N, 84° 59' 34.80" E | 2019 | 1172/CBT |
| 64 | AP-64 | Krushnaprasad)  | Odisha, Nayagargh  | 20° 08' 19.64" N, 85° 08' 41.28" E  | 2019 | 1173/CBT |
| 65 | AP-65 | Sarankula       | Odisha, Nayagargh  | 20° 02' 13.20" N, 85° 04' 40.80" E  | 2019 | 1174/CBT |
| 66 | AP-66 | Banigochha      | Odisha, Nayagargh  | 20° 24' 01.80" N, 84° 35' 11.04" E  | 2019 | 1175/CBT |
| 67 | AP-67 | Godi Alli       | Odisha, Nayagargh  | 20° 07' 58.80" N, 85° 08' 24.00" E  | 2019 | 1176/CBT |
| 68 | AP-68 | Godi Alli       | Odisha, Nayagargh  | 20° 06' 43.20" N, 85° 05' 13.20" E  | 2019 | 1177/CBT |
| 69 | AP-69 | Baigunia        | Odisha, Nayagargh  | 20° 15' 28.80" N, 85° 12' 39.60" E  | 2019 | 1178/CBT |
| 70 | AP-70 | Korada ghati    | Odisha,Kandhamala  | 19° 57' 50.40" N, 84° 19' 37.20" E  | 2019 | 1183/CBT |
| 71 | AP-71 | Raikia          | Odisha,Kandhamala  | 19° 58' 51.60" N, 84° 14' 24.00" E  | 2019 | 1184/CBT |
| 72 | AP-72 | Phiringia       | Odisha, Kandhamala | 20° 10' 55.20" N, 84° 04' 44.40" E  | 2019 | 1188/CBT |
| 73 | AP-73 | Nuabarada       | Odisha, Jajpur     | 20° 47' 38.40" N, 86° 02' 60.00" E  | 2019 | 1193/CBT |

|     |        |                 |                                |                                    |      |          |
|-----|--------|-----------------|--------------------------------|------------------------------------|------|----------|
| 74  | AP-74  | Panikoili       | Odisha, Jajpur                 | 20° 54' 43.20" N, 86° 13' 40.80" E | 2019 | 1194/CBT |
| 75  | AP-75  | Udayagiri       | Odisha, Jajpur                 | 20° 37' 37.20" N, 86° 14' 42.00" E | 2019 | 1195/CBT |
| 76  | AP-76  | Ranipathara     | Odisha, Baudh (Phulbani)       | 20° 29' 20.40" N, 84° 15' 28.80" E | 2019 | 1190/CBT |
| 77  | AP-77  | Phurlijharan    | Odisha, Kalahandi              | 19° 46' 54.22" N, 83° 06' 49.90" E | 2019 | 1191/CBT |
| 78  | AP-78  | Jagasahi        | Odisha, Kalahandi              | 19°45' 00.70" N, 83° 11' 45.12" E  | 2019 | 1192/CBT |
| 79  | AP-79  | Magurgadia      | Odisha, keonjhar               | 21° 38' 45.60" N, 85° 36' 25.20" E | 2019 | 1196/CBT |
| 80  | AP-80  | Judia ghati     | Odisha, keonjhar               | 21° 37' 44.40" N, 85° 34' 12.00" E | 2019 | 1197/CBT |
| 81  | AP-81  | Hadagargh       | Odisha, Keonjhar               | 21° 17' 21.12" N, 86° 19' 11.64" E | 2019 | 1198/CBT |
| 82  | AP-82  | Tirtol          | Odisha, Jagatsighpur           | 20° 20' 21.08" N, 86° 05' 52.04" E | 2019 | 1124/CBT |
| 83  | AP-83  | Chandanpur      | Odisha, Angul                  | 20° 46' 04.80" N, 84° 58' 48.00" E | 2019 | 1179/CBT |
| 84  | AP-84  | Bedashasana     | Odisha, Angul                  | 20° 42' 30.16" N, 85° 07' 58.80" E | 2019 | 1180/CBT |
| 85  | AP-85  | Tarava          | Odisha, Angul                  | 20° 42' 05.11" N, 84° 51' 13.89" E | 2019 | 1181/CBT |
| 86  | AP-86  | Laxmi Dungri    | Odisha, Sambalpur              | 21° 29' 56.40" N, 83° 55' 30.00" E | 2019 | 1161/CBT |
| 87  | AP-87  | Ashok Niwas     | Odisha, Sambalpur              | 21° 30' 43.20" N, 83° 51' 10.80" E | 2019 | 1162/CBT |
| 88  | AP-88  | Sanapalli       | Odisha, Sambalpur              | 21° 23' 13.20" N, 83° 56' 20.40" E | 2019 | 1163/CBT |
| 89  | AP-89  | Therubali       | Odisha, Rayagada               | 19° 17' 56.40" N, 83° 26' 27.60" E | 2019 | 1199/CBT |
| 90  | AP-90  | Kalyansighpur   | Odisha, Rayagada               | 19° 10' 48.00" N, 83° 25' 01.20" E | 2019 | 1200/CBT |
| 91  | AP-91  | Padampur        | Odisha, Rayagada               | 19° 14' 35.73" N, 83° 49' 33.96" E | 2019 | 1201/CBT |
| 92  | AP-92  | Behela          | West Bengal, South 24 Parganas | 22° 29' 52.08" N, 88° 18' 36.00" E | 2019 | 1202/CBT |
| 93  | AP-93  | Kakadwip        | West Bengal, South 24 Parganas | 21° 52' 33.60" N, 88° 11' 07.08" E | 2019 | 1203/CBT |
| 94  | AP-94  | Diamond harbour | West Bengal, South 24 Parganas | 22° 11' 52.80" N, 88° 12' 07.20" E | 2019 | 1204/CBT |
| 95  | AP-95  | Kulpi           | West Bengal, South 24 Parganas | 22° 04' 51.60" N, 88° 14' 38.40" E | 2019 | 1205/CBT |
| 96  | AP-96  | Kakadwip        | West Bengal, South 24 Parganas | 21° 52' 33.60"N, 88° 11' 07.08" E  | 2019 | 1206/CBT |
| 97  | AP-97  | Kakadwip        | West Bengal, South 24 Parganas | 21° 52' 33.60"N, 88° 11' 07.08" E  | 2019 | 1207/CBT |
| 98  | AP-98  | Laxmikantapur   | West Bengal, South 24 Parganas | 22° 06' 35.64" N, 88° 19' 15.24" E | 2019 | 1208/CBT |
| 99  | AP-99  | Amtala          | West Bengal, South 24 Parganas | 22° 22' 00.84" N, 88° 16' 39.72" E | 2019 | 1209/CBT |
| 100 | AP-100 | Patharapratima  | West Bengal, South 24 Parganas | 21° 47' 31.20" N, 88° 21' 18.00" E | 2019 | 1210/CBT |
| 101 | AP-101 | Baharu          | West Bengal, South 24 Parganas | 22° 12' 14.40" N, 88° 25' 41.88" E | 2019 | 1211/CBT |
| 102 | AP-102 | Raidighi        | West Bengal, South 24 Parganas | 22° 00' 04.32" N, 88° 26' 07.44" E | 2019 | 1212/CBT |
| 103 | AP-103 | Thakurpukur     | West Bengal, South 24 Parganas | 22° 27' 39.60" N, 88° 18' 21.60" E | 2019 | 1213/CBT |
| 104 | AP-104 | Garia           | West Bengal, South 24 Parganas | 22° 27' 57.60" N, 88° 23' 34.08" E | 2019 | 1214/CBT |
| 105 | AP-105 | Narayanpur      | West Bengal, South 24 Parganas | 21° 46' 15.00" N, 88°15' 04.00" E  | 2019 | 1215/CBT |
| 106 | AP-106 | Nischintapur    | West Bengal, South 24 Parganas | 21° 59' 24.00" N, 88° 12' 49.32" E | 2019 | 1216/CBT |
| 107 | AP-107 | Dholahat        | West Bengal, South 24 Parganas | 22° 01' 22.44" N, 88° 18' 01.80" E | 2019 | 1217/CBT |
| 108 | AP-108 | Kalyanpur       | West Bengal, South 24 Parganas | 22° 21' 02.88" N, 88° 25' 01.56" E | 2019 | 1218/CBT |
| 109 | AP-109 | Kashinagar      | West Bengal, South 24 Parganas | 22° 05' 21.48" N, 88° 25' 28.56" E | 2019 | 1219/CBT |
| 110 | AP-110 | Karanjali       | West Bengal, South 24 Parganas | 22° 01' 44.40" N, 88° 14' 52.80" E | 2019 | 1220/CBT |
| 111 | AP-111 | Jaynagar        | West Bengal, South 24 Parganas | 22° 10' 26.40" N, 88° 25' 22.80" E | 2019 | 1221/CBT |
| 112 | AP-112 | Baruipur        | West Bengal, South 24 Parganas | 22° 21' 32.40" N, 88° 25' 55.20" E | 2019 | 1222/CBT |
| 113 | AP-113 | Barrackpore     | West Bengal, North 24 Parganas | 22° 46' 02.64" N, 88° 23' 17.88" E | 2019 | 1223/CBT |
| 114 | AP-114 | Titagargh       | West Bengal, North 24 Parganas | 22° 44' 17.88" N, 88° 22' 25.32" E | 2019 | 1224/CBT |
| 115 | AP-115 | Barasat         | West Bengal, North 24 Parganas | 22° 43' 29.28" N, 88° 28' 44.04" E | 2019 | 1226/CBT |
| 116 | AP-116 | Salt Lake       | West Bengal, North 24 Parganas | 22° 34' 46.92" N, 88° 24' 51.48" E | 2019 | 1227/CBT |
| 117 | AP-117 | Bandipur        | West Bengal, North 24 Parganas | 22° 43' 47.64" N, 88° 23' 42.72" E | 2019 | 1228/CBT |
| 118 | AP-118 | Rahara          | West Bengal, North 24 Parganas | 22° 43' 26.40" N, 88° 23' 12.48" E | 2019 | 1229/CBT |

|     |        |                        |                                |                                    |      |          |
|-----|--------|------------------------|--------------------------------|------------------------------------|------|----------|
| 119 | AP-119 | Habra                  | West Bengal, North 24 Parganas | 22° 51' 19.80" N, 88° 44' 38.40" E | 2019 | 1230/CBT |
| 120 | AP-120 | Sworupnagar            | West Bengal, North 24 Parganas | 22° 48' 39.60" N, 88° 51' 21.60" E | 2019 | 1231/CBT |
| 121 | AP-121 | Madhyamgram            | West Bengal, North 24 Parganas | 22° 41' 32.64" N, 88° 27' 55.08" E | 2019 | 1232/CBT |
| 122 | AP-122 | Naihati                | West Bengal, North 24 Parganas | 22° 53' 20.40" N, 88° 25' 19.20" E | 2019 | 1233/CBT |
| 123 | AP-123 | Kulera,                | West Bengal, Birbhum           | 23° 54' 28.80" N, 87° 32' 52.80" E | 2019 | 1250/CBT |
| 124 | AP-124 | RK mission             | West Bengal, Birbham           | 23° 50' 24.72" N, 23° 50' 24.72" E | 2019 | 1251/CBT |
| 125 | AP-125 | Suri                   | West Bengal, Birbhum           | 23° 54' 14.40" N, 87° 31' 26.40" E | 2019 | 1252/CBT |
| 126 | AP-126 | Shantiniketan (Bolpur) | West Bengal, Birbhum           | 23° 40' 37.20" N, 87° 41' 06.00" E | 2019 | 1253/CBT |
| 127 | AP-127 | Kaliagangh             | West Bengal, Uttar Dinajpur    | 25° 38' 06.00" N, 88° 19' 40.80" E | 2019 | 1262/CBT |
| 128 | AP-128 | Jangipara              | West Bengal, Hooghly           | 22° 44' 10.68" N, 88° 03' 29.88" E | 2019 | 1240/CBT |
| 129 | AP-129 | Serampore              | West Bengal, Hooghly           | 22° 44' 52.80" N, 88° 20' 16.80" E | 2019 | 1241/CBT |
| 130 | AP-130 | Salboni                | West Bengal, Paschim Medinipur | 22° 38' 31.20" N, 87° 19' 08.40" E | 2019 | 1239/CBT |
| 131 | AP-131 | Marishda               | West Bengal, Purba Medinipur   | 21° 51' 01.80" N, 87° 44' 39.48" E | 2019 | 1235/CBT |
| 132 | AP-132 | Tamluk                 | West Bengal, Purba Medinipur   | 22° 17' 08.88" N, 22° 17' 08.88" E | 2019 | 1236/CBT |
| 133 | AP-133 | Haldia                 | West Bengal, Purba Medinipur   | 22° 03' 45.72" N, 88° 04' 59.88" E | 2019 | 1237/CBT |
| 134 | AP-134 | Ramnagar               | West Bengal, Purba Medinipur   | 21° 40' 40.80" N, 87° 33' 46.80" E | 2019 | 1238/CBT |
| 135 | AP-135 | Bankura                | West Bengal, Bankura           | 23° 13' 52.68" N, 87° 04' 42.24" E | 2019 | 1245/CBT |
| 136 | AP-136 | Bankura                | West Bengal, Bankura           | 23° 15' 18.72" N, 87° 05' 38.40" E | 2019 | 1246/CBT |
| 137 | AP-137 | Bankura                | West Bengal, Bankura           | 23° 13' 52.68" N, 87° 04' 42.24" E | 2019 | 1247/CBT |
| 138 | AP-138 | Khatra                 | West Bengal, Bankura           | 22° 58' 23.16" N, 86° 51' 16.92" E | 2019 | 1248/CBT |
| 139 | AP-139 | Nabadwip               | West Bengal, nadia             | 23° 24' 10.80" N, 23° 24' 10.80" E | 2019 | 1253/CBT |
| 140 | AP-140 | Kalyani                | West Bengal, Nadia             | 22° 58' 26.40" N, 88° 25' 58.80" E | 2019 | 1254/CBT |
| 141 | AP-141 | Debagram               | West Bengal, Nadia             | 23° 41' 16.80" N, 88° 18' 32.40" E | 2019 | 1255/CBT |
| 142 | AP-142 | Krishnanagar           | West Bengal, Nadia             | 23° 24' 03.60" N, 88° 30' 07.20" E | 2019 | 1257/CBT |
| 143 | AP-143 | Siliguri               | West Bengal, Darjeeling        | 26° 43' 37.56" N, 88° 23' 43.08" E | 2019 | 1263/CBT |
| 144 | AP-144 | Gazole                 | West Bengal, Maldah            | 25° 10' 40.80" N, 88° 14' 45.60" E | 2019 | 1258/CBT |
| 145 | AP-145 | Asansol                | West Bengal, Paschim Bardhaman | 23° 40' 22.80" N, 86° 57' 07.20" E | 2019 | 1260/CBT |
| 146 | AP-146 | Bardhaman              | West Bengal, Purba Bardhaman   | 23° 13' 55.20" N, 87° 51' 39.60" E | 2019 | 1261/CBT |
| 147 | AP-147 | chowbaga               | West Bengal, kolkata           | 22° 31' 27.23" N, 88° 25' 02.48" E | 2019 | 1243/CBT |
| 148 | AP-148 | Jadavpur               | West Bengal, Kolkata           | 22° 29' 43.80" N, 88° 22' 15.24" E | 2019 | 1244/CBT |
| 149 | AP-149 | Saktipur               | West Bengal, Murshidabad       | 24° 08' 24.00" N, 88° 15' 36.00" E | 2019 | 1259/CBT |
| 150 | AP-150 | Kashipur               | Purulia, WB                    | 23° 26' 02.40" N, 86° 40' 01.20" E | 2019 | 1249/CBT |

**Table S5.** Physicochemical properties of soil samples collected from different geographical locations of Odisha.

| Serial No. | Acc. No. | pH   | EC (Ds/m) | OC (%) | N (kg/ha) | P(kg/ha) | K(kg/ha) | S(kg/ha) |
|------------|----------|------|-----------|--------|-----------|----------|----------|----------|
| 1          | AP-1     | 5.9  | 0.2       | 0.25   | 120       | 20.18    | 170      | 47       |
| 2          | AP-2     | 4.52 | 0.1       | 0.69   | 145       | 17.89    | 153      | 60       |
| 3          | AP-3     | 4.65 | 0.09      | 0.74   | 103       | 15       | 167.1    | 43       |
| 4          | AP-4     | 5.81 | 0.09      | 0.75   | 95        | 17.98    | 161.9    | 30.5     |
| 5          | AP-5     | 4.53 | 0.08      | 0.73   | 34        | 39.78    | 385.2    | 60       |
| 6          | AP-6     | 4.52 | 0.1       | 0.69   | 107       | 27       | 253      | 60       |



|    |       |      |      |      |     |        |       |        |
|----|-------|------|------|------|-----|--------|-------|--------|
| 7  | AP-7  | 4.65 | 0.09 | 0.74 | 33  | 40     | 607.1 | 43     |
| 8  | AP-8  | 5.81 | 0.09 | 0.75 | 46  | 38.5   | 361.9 | 30.5   |
| 9  | AP-9  | 5.83 | 0.31 | 0.57 | 98  | 24.5   | 232.5 | 49     |
| 10 | AP-10 | 5.4  | 0.15 | 0.33 | 80  | 18.56  | 160.8 | 12.95  |
| 11 | AP-11 | 5.5  | 0.06 | 0.34 | 76  | 19.99  | 90.45 | 7.55   |
| 12 | AP-12 | 5.2  | 0.1  | 0.42 | 127 | 19.92  | 160.3 | 9.25   |
| 13 | AP-13 | 5.8  | 0.35 | 0.3  | 64  | 27.43  | 167   | 105.95 |
| 14 | AP-14 | 5.8  | 0.07 | 0.5  | 125 | 16.22  | 137   | 142    |
| 15 | AP-15 | 6.1  | 0.11 | 0.5  | 114 | 21.77  | 181   | 56.25  |
| 16 | AP-16 | 6.4  | 0.21 | 1    | 132 | 23.43  | 166   | 19.06  |
| 17 | AP-17 | 4.7  | 0.18 | 0.4  | 182 | 9.76   | 203   | 17.33  |
| 18 | AP-18 | 5.85 | 0.57 | 0.68 | 182 | 12.24  | 94    | 42.46  |
| 19 | AP-19 | 6.12 | 0.49 | 0.41 | 164 | 10.79  | 76    | 18.44  |
| 20 | AP-20 | 5.56 | 0.02 | 0.44 | 180 | 17     | 88    | 0.26   |
| 21 | AP-21 | 5.42 | 0.25 | 0.5  | 102 | 11.7   | 104   | 126    |
| 22 | AP-22 | 5.57 | 0.26 | 0.6  | 117 | 21.43  | 111   | 3.7    |
| 23 | AP-23 | 5.91 | 0.02 | 0.59 | 68  | 28.45  | 261.9 | 25     |
| 24 | AP-24 | 5.44 | 0.05 | 0.56 | 79  | 27.37  | 208.9 | 35     |
| 25 | AP-25 | 5.85 | 0.07 | 0.58 | 38  | 39.33  | 445.9 | 41.25  |
| 26 | AP-26 | 4.59 | 0.03 | 0.56 | 70  | 32.89  | 252.7 | 11.25  |
| 27 | AP-27 | 5.91 | 0.02 | 0.49 | 68  | 34.5   | 270.9 | 25     |
| 28 | AP-28 | 6.09 | 0.05 | 0.56 | 30  | 49     | 708.9 | 35     |
| 29 | AP-29 | 5.98 | 0.01 | 0.87 | 30  | 43.29  | 653.9 | 41.25  |
| 30 | AP-30 | 5.85 | 0.07 | 0.58 | 58  | 35.24  | 245.9 | 11.25  |
| 31 | AP-31 | 5.85 | 0.07 | 0.58 | 70  | 35.24  | 245.9 | 32.5   |
| 32 | AP-32 | 5.25 | 0.05 | 0.56 | 30  | 38.77  | 353.2 | 16.25  |
| 33 | AP-33 | 5.44 | 0.05 | 0.55 | 75  | 33.12  | 290.2 | 16.25  |
| 34 | AP-34 | 5.57 | 0.25 | 0.77 | 200 | 15.21  | 65    | 11.44  |
| 35 | AP-35 | 4.87 | 0.32 | 0.44 | 210 | 16     | 55.4  | 88     |
| 36 | AP-36 | 5.79 | 0.3  | 0.11 | 86  | 20.55  | 112.1 | 310    |
| 37 | AP-37 | 5.72 | 0.07 | 0.47 | 49  | 37.912 | 338   | 11.12  |
| 38 | AP-38 | 4.75 | 0.08 | 0.12 | 52  | 39.22  | 383   | 1670   |
| 39 | AP-39 | 5.62 | 0.08 | 0.35 | 140 | 11.1   | 60    | 26     |
| 40 | AP-40 | 6.07 | 0.15 | 0.35 | 44  | 46.11  | 384   | 1670   |
| 41 | AP-41 | 5.8  | 0.15 | 0.2  | 145 | 16     | 164   | 1670   |
| 42 | AP-42 | 5.27 | 0.1  | 0.4  | 95  | 25     | 201   | 27.5   |
| 43 | AP-43 | 5.21 | 0.06 | 0.35 | 102 | 19.1   | 204   | 1670   |
| 44 | AP-44 | 5.2  | 0.06 | 0.51 | 41  | 38.45  | 289   | 3.38   |
| 45 | AP-45 | 4.8  | 0.09 | 0.19 | 82  | 26.88  | 269   | 1.84   |
| 46 | AP-46 | 4.9  | 0.2  | 0.27 | 107 | 21.67  | 207   | 0.92   |

|    |       |      |      |      |       |       |       |       |
|----|-------|------|------|------|-------|-------|-------|-------|
| 47 | AP-47 | 4.6  | 0.01 | 0.47 | 76    | 29.78 | 251   | 3.99  |
| 48 | AP-48 | 4.9  | 0.1  | 0.54 | 124   | 14.8  | 99    | 5.21  |
| 49 | AP-49 | 4.8  | 0.3  | 0.69 | 150   | 15.89 | 162   | 1.84  |
| 50 | AP-50 | 5.2  | 0.02 | 0.92 | 70    | 30.05 | 291   | 2.15  |
| 51 | AP-51 | 6.1  | 0.01 | 0.51 | 77    | 33.4  | 332   | 0.31  |
| 52 | AP-52 | 5.2  | 0.01 | 1.4  | 80    | 35.4  | 296   | 2.15  |
| 53 | AP-53 | 7    | 0.01 | 0.73 | 68    | 33.2  | 225   | 4.6   |
| 54 | AP-54 | 5.2  | 0.01 | 0.73 | 69    | 33.2  | 225   | 1.53  |
| 55 | AP-55 | 4.52 | 0.08 | 0.32 | 90    | 28.43 | 198   | 15.93 |
| 56 | AP-56 | 6.6  | 0.38 | 0.6  | 97    | 29.25 | 297   | 28.6  |
| 57 | AP-57 | 5.9  | 0.53 | 0.78 | 83    | 25.5  | 220   | 17.12 |
| 58 | AP-58 | 5.94 | 0.2  | 0.42 | 90    | 26.25 | 245   | 4.34  |
| 59 | AP-59 | 5.6  | 0.12 | 0.41 | 95    | 28.75 | 232   | 28.96 |
| 60 | AP-60 | 5.92 | 0.14 | 0.9  | 78    | 29    | 234   | 33.7  |
| 61 | AP-61 | 5.42 | 0.06 | 0.4  | 118   | 12.5  | 167   | 28.96 |
| 62 | AP-62 | 5.41 | 0.05 | 0.32 | 100   | 12    | 187   | 51.38 |
| 63 | AP-63 | 5.23 | 0.25 | 0.24 | 87    | 11.5  | 428   | 6.52  |
| 64 | AP-64 | 5.22 | 0.21 | 0.43 | 125   | 10.75 | 196   | 4.34  |
| 65 | AP-65 | 5.56 | 0.26 | 0.18 | 64    | 20    | 298   | 15.2  |
| 66 | AP-66 | 6.29 | 0.16 | 0.6  | 76    | 30    | 262   | 22.29 |
| 67 | AP-67 | 5.13 | 0.18 | 0.19 | 50    | 29.25 | 444   | 38.01 |
| 68 | AP-68 | 5.13 | 0.18 | 0.19 | 90    | 26.25 | 245   | 38.01 |
| 69 | AP-69 | 5.2  | 0.52 | 0.32 | 87    | 27.75 | 307   | 23.26 |
| 70 | AP-70 | 6.2  | 0.12 | 0.32 | 32    | 48.33 | 424   | 120   |
| 71 | AP-71 | 5.7  | 0.2  | 0.48 | 74    | 25.1  | 302   | 480   |
| 72 | AP-72 | 5.4  | 0.2  | 0.48 | 112   | 12    | 220   | 138   |
| 73 | AP-73 | 5.07 | 0.42 | 0.25 | 156   | 17    | 90    | 37.5  |
| 74 | AP-74 | 4.08 | 0.07 | 0.69 | 112   | 23.88 | 99.89 | 1.69  |
| 75 | AP-75 | 5.76 | 0.33 | 0.39 | 178   | 7.2   | 87.9  | 2.78  |
| 76 | AP-76 | 5.8  | 0.64 | 0.4  | 142   | 12    | 180   | 370   |
| 77 | AP-77 | 5.6  | 0.56 | 0.54 | 70    | 16    | 289   | 10.2  |
| 78 | AP-78 | 5.8  | 0.42 | 0.44 | 40    | 46.31 | 234   | 10.8  |
| 79 | AP-79 | 6    | 0.33 | 0.37 | 136.4 | 24.15 | 213   | 8     |
| 80 | AP-80 | 6.4  | 0.26 | 0.35 | 172.4 | 14.9  | 222   | 2     |
| 81 | AP-81 | 7.7  | 0.44 | 0.63 | 65    | 38.7  | 233   | 5     |
| 82 | AP-82 | 5.48 | 0.33 | 0.5  | 164   | 12.9  | 82    | 1.75  |
| 83 | AP-83 | 7.14 | 0.36 | 1.1  | 90    | 28.99 | 199.1 | 13.65 |
| 84 | AP-84 | 8.32 | 0.52 | 0.78 | 101   | 28.77 | 233   | 17.76 |
| 85 | AP-85 | 5.42 | 0.39 | 1.01 | 150   | 16    | 203   | 17.38 |
| 86 | AP-86 | 4.4  | 0.1  | 0.6  | 136   | 14.99 | 150   | 40.95 |

|     |        |      |      |      |       |       |        |       |
|-----|--------|------|------|------|-------|-------|--------|-------|
| 87  | AP-87  | 5.1  | 0.1  | 0.64 | 143   | 16.78 | 170    | 30.54 |
| 88  | AP-88  | 5.5  | 0.2  | 0.14 | 119   | 19.33 | 120    | 1.04  |
| 89  | AP-89  | 5.86 | 0.17 | 0.29 | 147   | 14.32 | 189.26 | 16.25 |
| 90  | AP-90  | 6.42 | 0.1  | 0.12 | 125   | 7.84  | 205.6  | 6.25  |
| 91  | AP-91  | 5.03 | 0.26 | 0.34 | 160   | 14.56 | 66.32  | 5     |
| 92  | AP-92  | 6.5  | 0.89 | 0.96 | 165   | 15.1  | 67.5   | 15    |
| 93  | AP-93  | 5.9  | 1.2  | 0.65 | 230   | 13.89 | 147    | 9.04  |
| 94  | AP-94  | 5.2  | 1.8  | 0.55 | 226   | 9.8   | 43.2   | 38.86 |
| 95  | AP-95  | 6.32 | 0.73 | 0.3  | 180   | 19.91 | 156    | 5     |
| 96  | AP-96  | 5.25 | 0.2  | 0.57 | 218   | 16.01 | 86     | 11.62 |
| 97  | AP-97  | 5.9  | 1.2  | 0.65 | 231   | 11.5  | 30     | 9.04  |
| 98  | AP-98  | 5.21 | 0.62 | 0.38 | 225   | 10    | 29     | 12    |
| 99  | AP-99  | 5.95 | 1    | 0.98 | 97    | 28    | 135    | 6.12  |
| 100 | AP-100 | 5.1  | 1.5  | 0.57 | 243   | 8.11  | 118    | 20.78 |
| 101 | AP-101 | 5.9  | 0.59 | 0.84 | 230   | 8.99  | 126    | 10.35 |
| 102 | AP-102 | 5.93 | 0.79 | 0.69 | 135   | 29    | 178    | 28.08 |
| 103 | AP-103 | 6.5  | 0.89 | 0.96 | 192   | 31    | 67.5   | 15    |
| 104 | AP-104 | 6.92 | 0.97 | 0.99 | 189   | 21    | 42     | 7.39  |
| 105 | AP-105 | 6.23 | 1.9  | 0.53 | 183   | 28.4  | 86     | 10.77 |
| 106 | AP-106 | 5.1  | 1.8  | 0.63 | 179   | 26    | 57     | 9.42  |
| 107 | AP-107 | 6.7  | 1.6  | 0.65 | 185   | 30    | 134    | 23.27 |
| 108 | AP-108 | 6.48 | 0.56 | 0.68 | 239   | 15.01 | 40     | 5.28  |
| 109 | AP-109 | 5.5  | 2.6  | 0.41 | 134   | 23    | 137    | 11.7  |
| 110 | AP-110 | 5.81 | 1    | 0.73 | 181   | 26    | 178    | 6.12  |
| 111 | AP-111 | 6.2  | 0.76 | 0.76 | 178   | 23    | 263    | 5     |
| 112 | AP-112 | 6.51 | 2.9  | 0.62 | 155   | 29    | 218    | 10.98 |
| 113 | AP-113 | 7    | 0.23 | 0.27 | 170   | 12.36 | 54     | 2.8   |
| 114 | AP-114 | 6.9  | 0.09 | 0.37 | 243   | 13.56 | 56     | 2.1   |
| 115 | AP-115 | 7    | 0.23 | 0.27 | 227   | 12.8  | 45     | 2.8   |
| 116 | AP-116 | 6.9  | 0.09 | 0.37 | 222.4 | 13    | 67     | 2.1   |
| 117 | AP-117 | 6.8  | 0.09 | 0.35 | 219.4 | 16.09 | 230    | 2.2   |
| 118 | AP-118 | 6.2  | 0.42 | 0.78 | 230   | 14.3  | 70     | 30    |
| 119 | AP-119 | 6.35 | 0.41 | 0.38 | 173   | 32    | 185    | 12.4  |
| 120 | AP-120 | 6.9  | 0.09 | 0.37 | 157   | 30    | 228    | 2.1   |
| 121 | AP-121 | 6.9  | 0.09 | 0.37 | 171   | 32    | 228    | 2.1   |
| 122 | AP-122 | 5.23 | 0.98 | 0.63 | 149   | 30    | 206    | 23.65 |
| 123 | AP-123 | 5.69 | 0.11 | 0.57 | 159   | 15    | 128    | 13.63 |
| 124 | AP-124 | 5.88 | 0.17 | 0.59 | 210   | 17    | 184    | 10.93 |
| 125 | AP-125 | 5.84 | 0.06 | 0.81 | 123   | 25    | 180    | 11.7  |
| 126 | AP-126 | 4.45 | 0.19 | 0.93 | 97    | 27    | 167    | 15.64 |

|     |        |      |      |      |     |       |       |       |
|-----|--------|------|------|------|-----|-------|-------|-------|
| 127 | AP-127 | 6.9  | 0.06 | 0.36 | 170 | 14.1  | 161   | 1.8   |
| 128 | AP-128 | 4.91 | 0.61 | 0.62 | 247 | 7     | 30    | 12.7  |
| 129 | AP-129 | 7.82 | 0.17 | 0.72 | 106 | 27    | 334.6 | 20.6  |
| 130 | AP-130 | 4.95 | 0.11 | 0.63 | 217 | 16    | 136   | 11.35 |
| 131 | AP-131 | 7.2  | 0.29 | 0.42 | 201 | 18    | 109   | 7.81  |
| 132 | AP-132 | 5.7  | 0.69 | 0.42 | 218 | 17    | 110   | 2.96  |
| 133 | AP-133 | 6.9  | 1.3  | 0.47 | 65  | 41    | 140   | 5.7   |
| 134 | AP-134 | 5.9  | 0.39 | 0.42 | 145 | 35    | 268   | 6.12  |
| 135 | AP-135 | 5.2  | 0.14 | 0.78 | 235 | 8.13  | 35    | 6     |
| 136 | AP-136 | 5.4  | 0.15 | 0.55 | 232 | 9.1   | 46    | 6     |
| 137 | AP-137 | 5.2  | 0.31 | 0.81 | 155 | 15    | 234   | 4     |
| 138 | AP-138 | 5.9  | 0.31 | 0.88 | 230 | 17    | 78    | 4     |
| 139 | AP-139 | 5.32 | 0.27 | 0.46 | 150 | 18    | 253   | 14.46 |
| 140 | AP-140 | 7.57 | 0.44 | 0.53 | 189 | 20.1  | 292   | 18.56 |
| 141 | AP-141 | 8.37 | 0.1  | 0.48 | 175 | 25    | 156   | 12.33 |
| 142 | AP-142 | 6.35 | 0.41 | 0.38 | 129 | 26    | 185   | 12.4  |
| 143 | AP-143 | 5.44 | 0.01 | 1.08 | 241 | 12.78 | 120   | 8.59  |
| 144 | AP-144 | 4.7  | 0.21 | 0.15 | 170 | 24    | 188   | 4.6   |
| 145 | AP-145 | 5.3  | 0.17 | 0.54 | 195 | 23    | 175   | 9     |
| 146 | AP-146 | 4.8  | 0.05 | 0.49 | 107 | 15    | 189   | 13.59 |
| 147 | AP-147 | 5.7  | 0.24 | 1.1  | 235 | 10    | 54    | 8     |
| 148 | AP-148 | 5.6  | 0.36 | 1.2  | 99  | 34    | 245   | 14    |
| 149 | AP-149 | 6.9  | 0.17 | 0.67 | 229 | 15    | 50    | 4.2   |
| 150 | AP-150 | 6.4  | 0.43 | 0.3  | 140 | 35    | 215   | 4     |

**Table S6.** Climatic data for *Andrographis paniculata* accessions from different geographical regions of Eastern India.

| Serial No. | Acc. No. | Altitude | Annual<br>Precipitation(mm) | Max<br>temp.(°C) | Minimum<br>temp.(°C) | Average<br>temp.(°C) | Annual<br>RH | UV<br>Index |
|------------|----------|----------|-----------------------------|------------------|----------------------|----------------------|--------------|-------------|
| 1          | AP-1     | 47       | 1505                        | 36.6             | 15.6                 | 27.4                 | 78.79        | 6.67        |
| 2          | AP-2     | 39       | 1428                        | 36.1             | 15.7                 | 27.2                 | 67.50        | 6.67        |
| 3          | AP-3     | 43       | 1428                        | 36.1             | 15.7                 | 27.2                 | 67.50        | 6.67        |
| 4          | AP-4     | 39       | 1428                        | 36.1             | 15.7                 | 27.2                 | 67.50        | 6.67        |
| 5          | AP-5     | 39       | 1428                        | 36.1             | 15.7                 | 27.2                 | 67.50        | 6.67        |
| 6          | AP-6     | 43       | 1428                        | 36.1             | 15.7                 | 27.2                 | 67.50        | 6.67        |
| 7          | AP-7     | 43       | 1428                        | 36.1             | 15.7                 | 27.2                 | 67.50        | 6.67        |
| 8          | AP-8     | 43       | 1428                        | 36.1             | 15.7                 | 27.2                 | 67.50        | 6.67        |
| 9          | AP-9     | 43       | 1428                        | 36.1             | 15.7                 | 27.2                 | 67.50        | 6.67        |
| 10         | AP-10    | 6        | 1486                        | 36.2             | 14                   | 26.8                 | 76.14        | 7.08        |

|    |       |      |      |      |      |      |       |      |
|----|-------|------|------|------|------|------|-------|------|
| 11 | AP-11 | 53   | 1598 | 36.2 | 14   | 26.7 | 76.14 | 7.08 |
| 12 | AP-12 | 19   | 1496 | 36.2 | 14   | 26.9 | 76.14 | 7.08 |
| 13 | AP-13 | 20   | 1191 | 32.5 | 16.6 | 26.7 | 63.50 | 6.83 |
| 14 | AP-14 | 21   | 1194 | 32.5 | 16.6 | 26.8 | 63.50 | 6.83 |
| 15 | AP-15 | 16   | 1194 | 32.5 | 16.6 | 26.8 | 63.50 | 6.83 |
| 16 | AP-16 | 46   | 1194 | 33.4 | 13.7 | 26.8 | 63.50 | 6.83 |
| 17 | AP-17 | 46   | 1194 | 33.4 | 13.7 | 26.8 | 63.50 | 6.83 |
| 18 | AP-18 | 95   | 1194 | 32.5 | 16.6 | 26.8 | 63.50 | 6.83 |
| 19 | AP-19 | 188  | 1194 | 32.5 | 16.6 | 26.8 | 63.50 | 6.83 |
| 20 | AP-20 | 29   | 1515 | 38.3 | 15.5 | 27.6 | 80.36 | 6.83 |
| 21 | AP-21 | 50   | 1515 | 38.3 | 15.5 | 27.6 | 65.92 | 6.83 |
| 22 | AP-22 | 29   | 1515 | 38.3 | 15.5 | 27.6 | 65.92 | 6.83 |
| 23 | AP-23 | 59   | 1248 | 33.4 | 13.7 | 24.8 | 67.00 | 6.75 |
| 24 | AP-24 | 1089 | 1247 | 33.4 | 13.7 | 24.7 | 67.00 | 6.75 |
| 25 | AP-25 | 658  | 1245 | 33.4 | 13.7 | 24.8 | 67.00 | 6.75 |
| 26 | AP-26 | 124  | 1249 | 33.4 | 13.7 | 24.8 | 67.00 | 6.75 |
| 27 | AP-27 | 167  | 1248 | 33.4 | 13.7 | 24.8 | 67.00 | 6.75 |
| 28 | AP-28 | 124  | 1247 | 33.4 | 13.7 | 24.7 | 67.00 | 6.75 |
| 29 | AP-29 | 124  | 1245 | 33.4 | 13.7 | 24.8 | 67.00 | 6.75 |
| 30 | AP-30 | 658  | 1249 | 33.4 | 13.7 | 24.8 | 67.00 | 6.75 |
| 31 | AP-31 | 658  | 1249 | 33.4 | 13.7 | 24.8 | 67.00 | 6.75 |
| 32 | AP-32 | 429  | 1249 | 33.4 | 13.7 | 24.8 | 67.00 | 6.75 |
| 33 | AP-33 | 71   | 1249 | 33.4 | 13.7 | 24.8 | 67.00 | 6.75 |
| 34 | AP-34 | 11   | 1428 | 34.9 | 16.4 | 27.2 | 61.17 | 6.67 |
| 35 | AP-35 | 9    | 1428 | 34.9 | 16.4 | 27.3 | 61.17 | 6.67 |
| 36 | AP-36 | 9    | 1428 | 34.9 | 16.4 | 27.4 | 61.17 | 6.67 |
| 37 | AP-37 | 13   | 1428 | 34.9 | 16.4 | 27.5 | 63.50 | 6.75 |
| 38 | AP-38 | 57   | 1472 | 37.9 | 14.6 | 27   | 61.00 | 6.83 |
| 39 | AP-39 | 116  | 1472 | 37.9 | 14.6 | 27   | 61.00 | 6.83 |
| 40 | AP-40 | 124  | 1472 | 37.9 | 14.6 | 27   | 65.92 | 6.83 |
| 41 | AP-41 | 187  | 1472 | 37.9 | 14.6 | 27   | 65.92 | 6.83 |
| 42 | AP-42 | 116  | 1472 | 37.9 | 14.6 | 27   | 65.92 | 6.83 |
| 43 | AP-43 | 240  | 1472 | 37.9 | 14.6 | 27   | 65.92 | 6.83 |
| 44 | AP-44 | 33   | 1465 | 37.2 | 13.7 | 27.3 | 59.25 | 7.08 |
| 45 | AP-45 | 40   | 1610 | 38.5 | 14.2 | 26.1 | 59.25 | 7.08 |
| 46 | AP-46 | 27   | 1459 | 38.5 | 14.2 | 27.1 | 59.25 | 7.08 |
| 47 | AP-47 | 40   | 1670 | 37.2 | 13.7 | 26.7 | 59.25 | 7.08 |
| 48 | AP-48 | 388  | 1610 | 38.5 | 14.2 | 26.1 | 59.25 | 7.08 |
| 49 | AP-49 | 403  | 1459 | 38.5 | 14.2 | 27.1 | 59.25 | 7.08 |
| 50 | AP-50 | 573  | 1459 | 38.5 | 14.2 | 27.1 | 59.25 | 7.08 |

|    |       |     |      |      |      |      |       |      |
|----|-------|-----|------|------|------|------|-------|------|
| 51 | AP-51 | 573 | 1308 | 38.5 | 14.2 | 26.1 | 59.25 | 7.08 |
| 52 | AP-52 | 573 | 1157 | 38.5 | 14.2 | 27   | 59.25 | 7.08 |
| 53 | AP-53 | 325 | 855  | 38.5 | 14.2 | 27.3 | 59.25 | 7.08 |
| 54 | AP-54 | 114 | 704  | 38.5 | 14.2 | 26.1 | 59.25 | 7.08 |
| 55 | AP-55 | 93  | 1516 | 37.3 | 14.5 | 26.9 | 65.42 | 6.67 |
| 56 | AP-56 | 138 | 1516 | 37.3 | 14.5 | 26.9 | 65.42 | 6.67 |
| 57 | AP-57 | 121 | 1516 | 37.3 | 14.5 | 26.9 | 65.42 | 6.67 |
| 58 | AP-58 | 69  | 1516 | 37.3 | 14.5 | 26.9 | 65.42 | 6.67 |
| 59 | AP-59 | 91  | 1516 | 37.3 | 14.5 | 26.9 | 65.42 | 6.67 |
| 60 | AP-60 | 87  | 1516 | 37.3 | 14.5 | 26.9 | 65.42 | 6.67 |
| 61 | AP-61 | 88  | 1396 | 38.2 | 14.7 | 27.2 | 65.42 | 6.67 |
| 62 | AP-62 | 43  | 1396 | 38.2 | 14.7 | 27.2 | 65.42 | 6.67 |
| 63 | AP-63 | 128 | 1396 | 38.2 | 14.7 | 27.2 | 65.42 | 6.67 |
| 64 | AP-64 | 69  | 1396 | 38.2 | 14.7 | 27.2 | 65.42 | 6.67 |
| 65 | AP-65 | 101 | 1396 | 38.2 | 14.7 | 27.2 | 65.42 | 6.67 |
| 66 | AP-66 | 247 | 1396 | 38.2 | 14.7 | 27.2 | 65.42 | 6.67 |
| 67 | AP-67 | 69  | 1396 | 38.2 | 14.7 | 27.2 | 65.42 | 6.67 |
| 68 | AP-68 | 93  | 1396 | 38.2 | 14.7 | 27.2 | 65.42 | 6.67 |
| 69 | AP-69 | 64  | 1396 | 38.2 | 14.7 | 27.2 | 65.42 | 6.67 |
| 70 | AP-70 | 755 | 1323 | 37.5 | 12.1 | 25.1 | 55.50 | 6.83 |
| 71 | AP-71 | 740 | 1323 | 37.5 | 12.1 | 25.1 | 55.50 | 6.83 |
| 72 | AP-72 | 722 | 1323 | 37.5 | 12.1 | 25.1 | 55.50 | 6.83 |
| 73 | AP-73 | 28  | 1516 | 37.3 | 14.5 | 26.9 | 62.42 | 7.08 |
| 74 | AP-74 | 19  | 1516 | 37.3 | 14.5 | 26.9 | 62.42 | 7.08 |
| 75 | AP-75 | 14  | 1516 | 37.3 | 14.5 | 26.9 | 62.42 | 7.08 |
| 76 | AP-76 | 541 | 1323 | 37.5 | 12.1 | 25.1 | 55.50 | 6.83 |
| 77 | AP-77 | 369 | 1253 | 39.4 | 13.6 | 26.7 | 55.50 | 6.75 |
| 78 | AP-78 | 342 | 1253 | 39.4 | 13.6 | 26.7 | 55.42 | 6.75 |
| 79 | AP-79 | 471 | 1494 | 35.7 | 15.2 | 26.9 | 64.25 | 6.33 |
| 80 | AP-80 | 511 | 1494 | 35.7 | 15.2 | 26.9 | 64.25 | 6.33 |
| 81 | AP-81 | 56  | 1494 | 35.7 | 15.2 | 26.9 | 64.25 | 6.33 |
| 82 | AP-82 | 15  | 1515 | 38.3 | 15.5 | 27.6 | 67.25 | 6.67 |
| 83 | AP-83 | 204 | 1249 | 40   | 13.4 | 26.9 | 57.92 | 6.83 |
| 84 | AP-84 | 114 | 1249 | 40   | 13.4 | 26.9 | 57.92 | 6.83 |
| 85 | AP-85 | 257 | 1249 | 40   | 13.4 | 26.9 | 57.92 | 6.83 |
| 86 | AP-86 | 155 | 1638 | 42.1 | 12.2 | 26.8 | 55.25 | 6.83 |
| 87 | AP-87 | 188 | 1638 | 42.1 | 12.2 | 26.8 | 55.25 | 6.83 |
| 88 | AP-88 | 163 | 1638 | 42.1 | 12.2 | 26.8 | 55.25 | 6.83 |
| 89 | AP-89 | 249 | 1312 | 36.7 | 14.9 | 26.5 | 68.58 | 6.58 |
| 90 | AP-90 | 223 | 1312 | 36.7 | 14.9 | 26.5 | 68.58 | 6.58 |

|     |        |     |      |      |      |      |       |      |
|-----|--------|-----|------|------|------|------|-------|------|
| 91  | AP-91  | 121 | 1312 | 36.7 | 14.9 | 26.5 | 68.58 | 6.58 |
| 92  | AP-92  | 8   | 1735 | 35.9 | 12.6 | 26.2 | 57.83 | 6.83 |
| 93  | AP-93  | 5   | 1333 | 37.8 | 11.4 | 26.4 | 63.08 | 6.92 |
| 94  | AP-94  | 4   | 1399 | 34.6 | 13.7 | 26.3 | 62.92 | 6.83 |
| 95  | AP-95  | 4   | 1472 | 34.1 | 14   | 26.3 | 63.25 | 6.90 |
| 96  | AP-96  | 5   | 1333 | 37.8 | 11.4 | 26.4 | 63.08 | 6.92 |
| 97  | AP-97  | 5   | 1333 | 37.8 | 11.4 | 26.4 | 63.08 | 6.92 |
| 98  | AP-98  | 4   | 1657 | 33.2 | 14.7 | 26.3 | 58.00 | 6.83 |
| 99  | AP-99  | 6   | 1157 | 38.4 | 12.7 | 26.6 | 58.50 | 6.83 |
| 100 | AP-100 | 4   | 1333 | 37.8 | 11.4 | 26.4 | 63.08 | 6.92 |
| 101 | AP-101 | 8   | 1609 | 35.1 | 13.1 | 26.3 | 61.00 | 6.83 |
| 102 | AP-102 | 4   | 1592 | 33.5 | 14.3 | 26.2 | 60.83 | 6.75 |
| 103 | AP-103 | 8   | 1735 | 35.9 | 12.6 | 26.2 | 57.83 | 6.83 |
| 104 | AP-104 | 6   | 1607 | 34.8 | 13.2 | 26.3 | 56.50 | 6.75 |
| 105 | AP-105 | 4   | 1333 | 37.8 | 11.4 | 26.4 | 63.08 | 6.92 |
| 106 | AP-106 | 6   | 1472 | 34.1 | 14   | 26.3 | 63.25 | 6.90 |
| 107 | AP-107 | 5   | 1399 | 34.6 | 13.7 | 26.3 | 62.92 | 6.83 |
| 108 | AP-108 | 10  | 1609 | 35.1 | 13.1 | 26.3 | 61.00 | 6.83 |
| 109 | AP-109 | 5   | 1657 | 33.2 | 14.7 | 26.3 | 58.00 | 6.83 |
| 110 | AP-110 | 4   | 1657 | 33.2 | 14.7 | 26.3 | 58.00 | 6.83 |
| 111 | AP-111 | 8   | 1233 | 38.2 | 12.2 | 26.4 | 53.42 | 7.25 |
| 112 | AP-112 | 10  | 1609 | 35.1 | 13.1 | 26.4 | 61.00 | 6.83 |
| 113 | AP-113 | 10  | 1533 | 36.4 | 12.3 | 26.4 | 59.42 | 6.92 |
| 114 | AP-114 | 9   | 1569 | 36.4 | 12.4 | 26.4 | 59.42 | 6.92 |
| 115 | AP-115 | 11  | 1527 | 36.2 | 12.3 | 26.3 | 58.83 | 6.75 |
| 116 | AP-116 | 6   | 1689 | 35.9 | 12.6 | 26.3 | 59.33 | 6.67 |
| 117 | AP-117 | 9   | 1533 | 36.4 | 12.3 | 26.4 | 59.42 | 6.92 |
| 118 | AP-118 | 9   | 1627 | 36.3 | 12.4 | 26.4 | 59.33 | 6.92 |
| 119 | AP-119 | 7   | 1535 | 36.3 | 11.7 | 26.2 | 60.08 | 7.00 |
| 120 | AP-120 | 5   | 1574 | 35.8 | 11.8 | 26.2 | 60.67 | 6.92 |
| 121 | AP-121 | 8   | 1527 | 36.2 | 12.3 | 26.3 | 58.83 | 6.75 |
| 122 | AP-122 | 14  | 1533 | 36.4 | 12.3 | 26.4 | 59.42 | 6.92 |
| 123 | AP-123 | 62  | 1311 | 38.1 | 11.8 | 26.4 | 55.50 | 7.17 |
| 124 | AP-124 | 51  | 1289 | 38.3 | 11.8 | 26.3 | 55.67 | 7.33 |
| 125 | AP-125 | 70  | 1307 | 38.2 | 11.4 | 26.2 | 54.00 | 7.34 |
| 126 | AP-126 | 54  | 1287 | 38   | 12   | 26.3 | 55.33 | 7.08 |
| 127 | AP-127 | 39  | 3197 | 32.2 | 10.2 | 24   | 59.83 | 6.67 |
| 128 | AP-128 | 9   | 1260 | 38.7 | 12.7 | 26.8 | 57.50 | 6.92 |
| 129 | AP-129 | 9   | 1533 | 36.4 | 12.3 | 26.4 | 59.42 | 6.92 |
| 130 | AP-130 | 38  | 1306 | 38.3 | 13.1 | 26.8 | 57.08 | 7.08 |

|     |        |     |      |      |      |      |       |      |
|-----|--------|-----|------|------|------|------|-------|------|
| 131 | AP-131 | 5   | 1580 | 34.2 | 14.5 | 26.6 | 67.00 | 6.83 |
| 132 | AP-132 | 3   | 1550 | 35.6 | 13.6 | 26.5 | 61.00 | 7.08 |
| 133 | AP-133 | 7   | 1451 | 34   | 14.1 | 26.4 | 63.08 | 6.92 |
| 134 | AP-134 | 7   | 1526 | 34.5 | 14.5 | 26.5 | 59.42 | 6.92 |
| 135 | AP-135 | 88  | 1236 | 38.6 | 12.5 | 26.6 | 53.42 | 7.25 |
| 136 | AP-136 | 94  | 1236 | 38.6 | 12.5 | 26.6 | 53.42 | 7.25 |
| 137 | AP-137 | 88  | 1236 | 38.6 | 12.5 | 26.6 | 53.42 | 7.25 |
| 138 | AP-138 | 133 | 1193 | 38.5 | 12.4 | 26.5 | 53.42 | 7.17 |
| 139 | AP-139 | 13  | 1299 | 37.8 | 11.5 | 26.4 | 58.92 | 7.17 |
| 140 | AP-140 | 12  | 1345 | 36.8 | 11.9 | 26.3 | 60.25 | 7.08 |
| 141 | AP-141 | 16  | 1350 | 37.8 | 11.6 | 26.4 | 57.58 | 7.08 |
| 142 | AP-142 | 14  | 1353 | 37.7 | 11.2 | 26.4 | 58.92 | 7.25 |
| 143 | AP-143 | 123 | 3274 | 32.5 | 9.7  | 24   | 61.17 | 6.00 |
| 144 | AP-144 | 38  | 1442 | 35.6 | 10.5 | 25.2 | 56.75 | 6.83 |
| 145 | AP-145 | 132 | 1298 | 38.9 | 12.1 | 26.5 | 50.83 | 7.25 |
| 146 | AP-146 | 38  | 1313 | 37.6 | 12.6 | 26.3 | 57.92 | 7.17 |
| 147 | AP-147 | 3   | 1735 | 35.9 | 12.6 | 26.2 | 57.92 | 6.83 |
| 148 | AP-148 | 10  | 1607 | 34.8 | 13.2 | 26.3 | 56.50 | 6.75 |
| 149 | AP-149 | 5   | 1365 | 37.7 | 11.7 | 26.3 | 56.17 | 7.08 |
| 150 | AP-150 | 159 | 1164 | 39.4 | 12.3 | 26.5 | 49.42 | 7.25 |

---

RH=Relative humidity
